# Supplementary material for: Simple electroless plating of platinum nanoparticles on graphdiyne for chlorogenic acid electrochemical sensing
Source: Royal Society of Chemistry journal article supplement (doi:10.1039/d6ra00158k), 2026-01-01
Supplement: d6ra00158k1.pdf [file d6ra00158k1.pdf]

## **Supporting information**

### **Simple electroless plating of platinum nanoparticles on graphdiyne for chlorogenic acid electrochemical sensing**

Yong Zhou,<sup>a#</sup> Geyuan Zheng,<sup>a#</sup> Wanlu Chen,<sup>b</sup> Jiang Chen<sup>a\*</sup>

<sup>a</sup> Implantology Department, School and Hospital of Stomatology, Fujian Medical University, Fuzhou 350001, China

<sup>b</sup> Endodontics Department, School and Hospital of Stomatology, Fujian Medical University, Fuzhou 350001, China

---

<sup>#</sup> Co-first authors.

<sup>\*</sup> Corresponding author. E-mail address: Dentistjiang@sina.com.

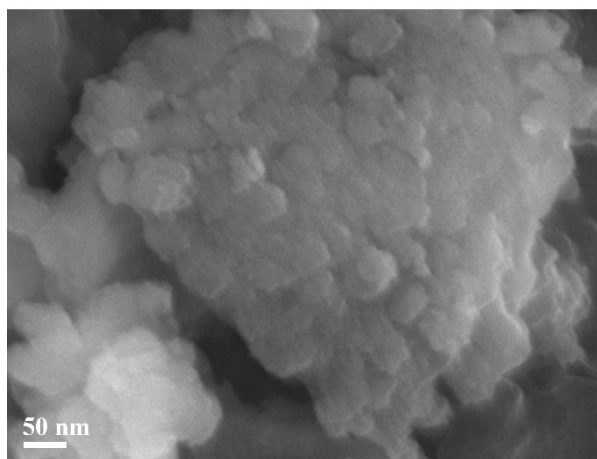

**Figure S1.** The higher-resolution SEM image of Pt/GDY.

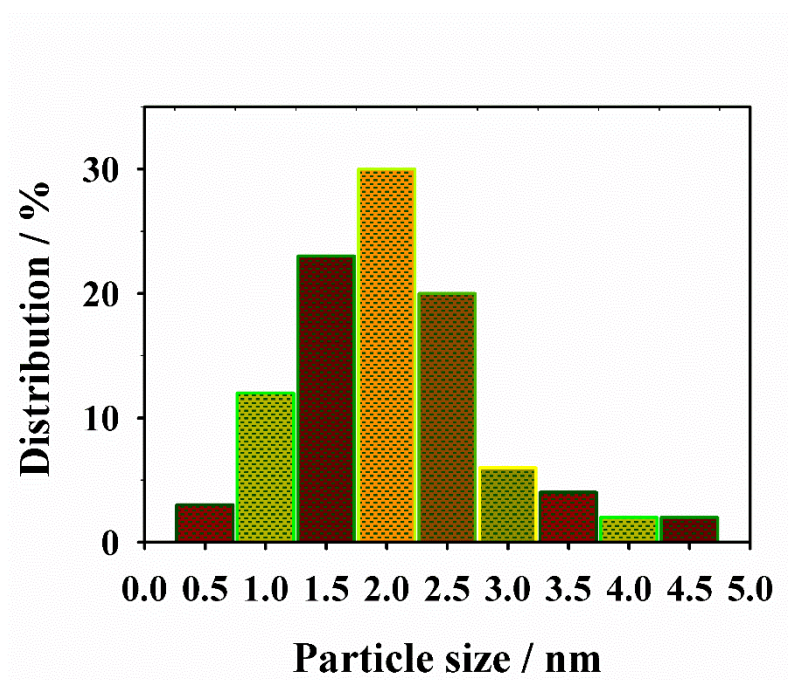

**Figure S2.** The distribution of Pt NPs size.

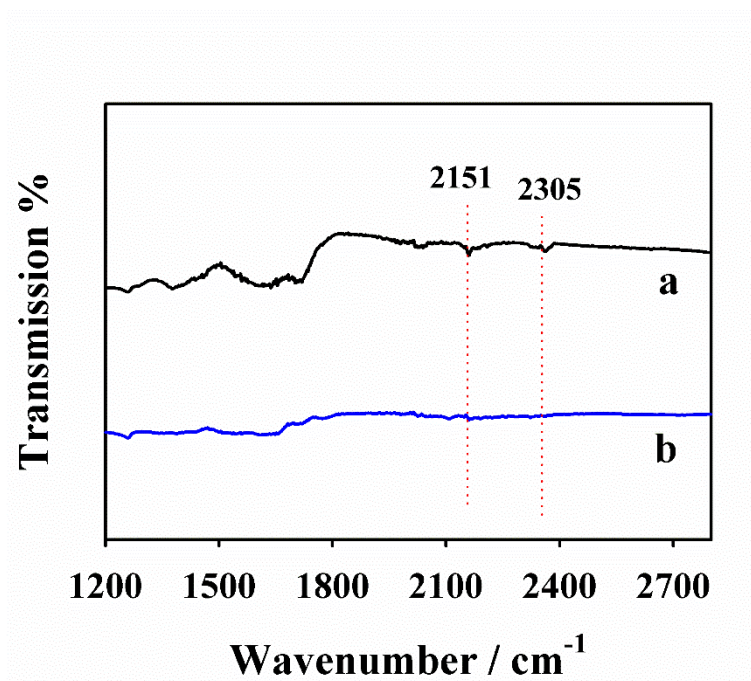

**Figure S3.** FT-IR spectroscopy of (a) GDY and (b) Pt/GDY.

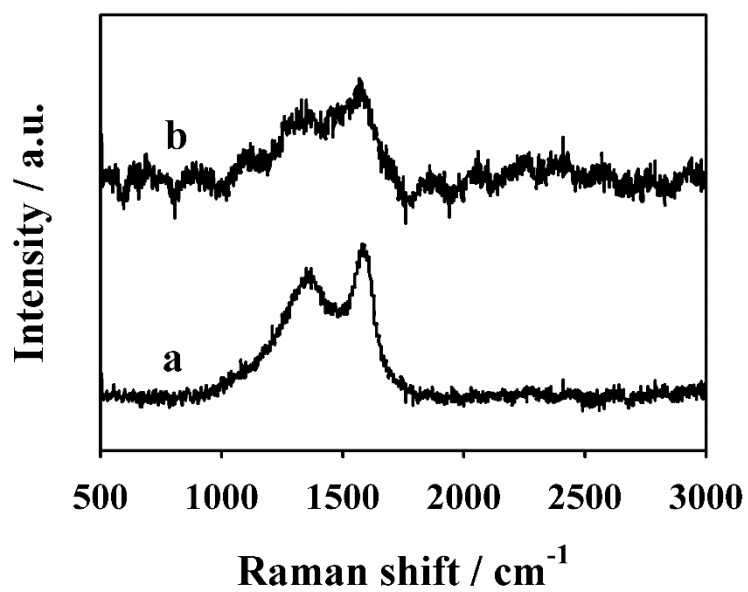

**Figure S4.** Raman spectroscopy of (a) GDY and (b) Pt/GDY.

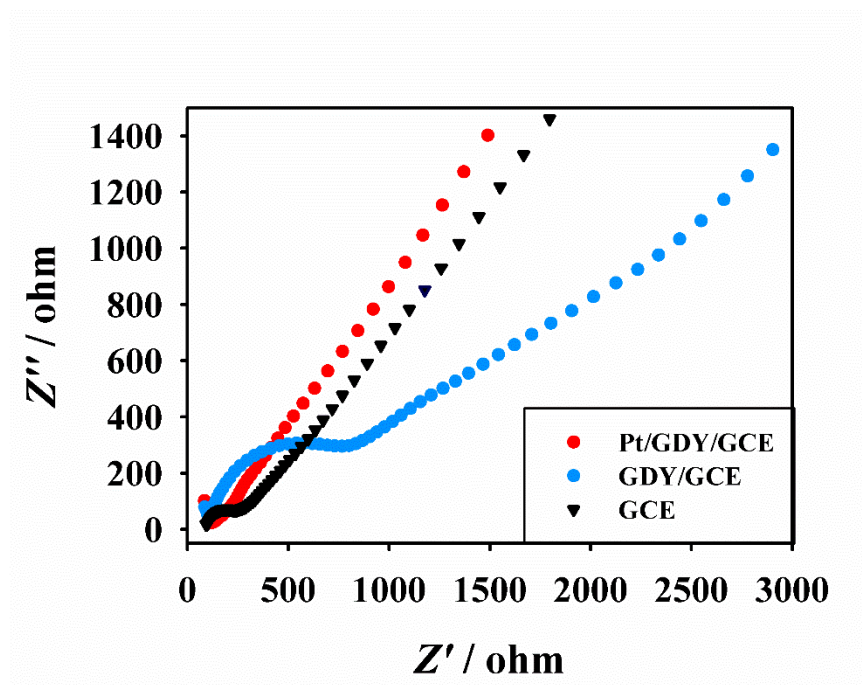

**Figure S5.** EIS plots of different electrodes.

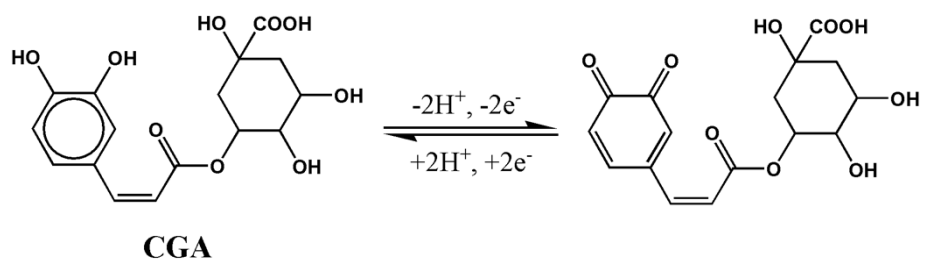

**Figure S6.** The proposed electrochemical redox mechanism of CGA at Pt/GDY/GCE.

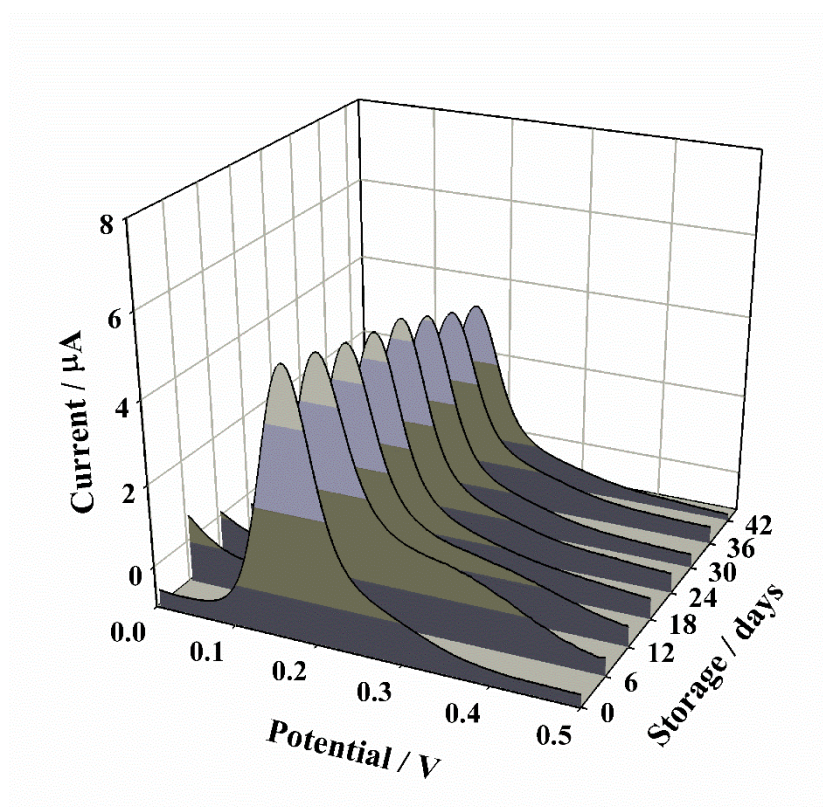

**Figure S7.** The DPV responses of Pt/GDY/GCE upon different storage time.



**Table S1.** The detection of CGA based on Pt/GDY sensor in real samples.

| Samples | Added / nM | Found / nM | Recovery (%) |
|---------|------------|------------|--------------|
| Serum   | 50         | 48.6       | 97.2         |
|         | 200        | 185.3      | 92.6         |
|         | 500        | 474.5      | 94.8         |
| Coffee  | 50         | 46.2       | 92.4         |
|         | 200        | 188.6      | 94.3         |
|         | 500        | 460.7      | 91.5         |
